# Supplementary material for: Spatial Distribution and Risk Assessment of Antibiotics in 15 Pharmaceutical Plants in the Pearl River Delta
Source: MDPI journal article supplement (doi:10.3390/toxics11040382), 2023-04-17
Supplement: s1 [file s1]

### **Supplementary Information**

## **Spatial distribution and risk assessment of antibiotics in 15 pharmaceutical plants in the Pearl River Delta**

Yuanfei Liu<sup>1,2</sup>, Xiaoxia Shi<sup>1</sup>, Xiaoxia Chen<sup>1,3</sup>, Ping Ding<sup>1</sup>, Lijuan Zhang<sup>1</sup>, Jian Yang<sup>1</sup>, Jun Pan<sup>1,3</sup>, Yunjiang Yu<sup>1</sup>, Jinhua Wu<sup>2</sup>, Guocheng Hu<sup>1\*</sup>

<sup>1</sup>State Environmental Protection Key Laboratory of Environmental Pollution Health Risk Assessment, South China Institute of Environmental Sciences, Ministry of Ecology and Environment, Guangzhou 510535, China

<sup>2</sup>School of Environment and Energy, South China University of Technology, Guangzhou 510641, China

<sup>3</sup>Chongqing Key Laboratory of Water Environment Evolution and Pollution Control in Three Gorges Reservoir, Chongqing Three Gorges University, Chongqing 404000, China

\*Corresponding author

E-mail: [huguocheng@scies.org](mailto:huguocheng@scies.org) (GH)

### **Text S1. Pre-treatment methods for wastewater and sludge samples**

The solid phase extraction (SPE) was used to extract target antibiotics from wastewater samples according to a previous study. First, 1000 mL of wastewater samples was filtered through a 0.47  $\mu\text{m}$  glass fiber membrane. The  $\text{Na}_2\text{EDTA}$  was added to the wastewater samples to inhibit complexation of target antibiotics with other metal ions, thus improving the recovery of the substances to be measured. All wastewater samples were acidified with 4 M sulfuric acid to  $\text{pH}=3.0$ . Before pretreatment, internal standard (100 ng/L) was added to each sample for the quantitative analysis of each analyte. Oasis HLB cartridges were activated sequentially with 10 mL methanol and 10 mL ultrapure water in turn. Subsequently, all water samples were passed through solid phase extraction column at a low flow rate. After extraction, the cartridges were then rinsed with  $3\times 5$  mL ultrapure water and then drained under vacuum for an hour. Next, the target antibiotics in the cartridge were eluted with 5 mL methanol, 4 mL ethyl acetate, and 3 mL dichloromethane. The analytes were then concentrated under a stream of nitrogen until the methanol was almost completely evaporated. Finally, the sample is redissolved in 1 mL methanol and stored in a brown sample bottle for analysis.

**Table S1** Chemicals and internal standards

| Antibiotics                   | Abbr. <sup>a</sup>   | Group                  | ISTD <sup>b</sup>                            |
|-------------------------------|----------------------|------------------------|----------------------------------------------|
| Sulfadiazine                  | SDZ                  | sulfonamides (SAs)     | sulfamethoxazole-D <sub>4</sub>              |
| Sulfapyridine                 | SPD                  | sulfonamides (SAs)     | sulfamethoxazole-D <sub>4</sub>              |
| Trimethoprim                  | TMP                  | sulfonamides (SAs)     | sulfamethoxazole-D <sub>4</sub>              |
| Sulfamethazine                | SMZ                  | sulfonamides (SAs)     | sulfamethazine- <sup>13</sup> C <sub>6</sub> |
| Sulfameter                    | SM                   | sulfonamides (SAs)     | sulfamethazine- <sup>13</sup> C <sub>6</sub> |
| Sulfamonomethoxine            | SMM                  | sulfonamides (SAs)     | sulfamethoxazole-D <sub>4</sub>              |
| Sulfachlorpyridazine          | SCP                  | sulfonamides (SAs)     | sulfamethoxazole-D <sub>4</sub>              |
| Sulfamethoxazole              | SMX                  | sulfonamides (SAs)     | sulfamethoxazole-D <sub>4</sub>              |
| Sulfadoxine                   | SA                   | sulfonamides (SAs)     | sulfamethoxazole-D <sub>4</sub>              |
| Sulfaquinoxaline              | SQX                  | sulfonamides (SAs)     | sulfamethoxazole-D <sub>4</sub>              |
| Sulfadimethoxine              | SDM                  | sulfonamides (SAs)     | sulfamethoxazole-D <sub>4</sub>              |
| Sulfacetamide                 | SCT                  | sulfonamides (SAs)     | sulfamethoxazole-D <sub>4</sub>              |
| Sulfathiazole                 | STZ                  | sulfonamides (SAs)     | sulfamethazine- <sup>13</sup> C <sub>6</sub> |
| Marbofloxacin                 | MAR                  | fluoroquinolones (FQs) | ciprofloxacin-D <sub>8</sub>                 |
| Norfloxacin                   | NFX                  | fluoroquinolones (FQs) | ciprofloxacin-D <sub>8</sub>                 |
| Ofloxacin                     | OFL                  | fluoroquinolones (FQs) | ciprofloxacin-D <sub>8</sub>                 |
| Ciprofloxacin                 | CIP                  | fluoroquinolones (FQs) | ciprofloxacin-D <sub>8</sub>                 |
| Enrofloxacin                  | EFX                  | fluoroquinolones (FQs) | ciprofloxacin-D <sub>8</sub>                 |
| Pefloxacin                    | PEF                  | fluoroquinolones (FQs) | ciprofloxacin-D <sub>8</sub>                 |
| Lincomycin                    | LIN                  | macrolides (MLs)       | erythromycin- <sup>13</sup> C-D <sub>3</sub> |
| Erythromycin-H <sub>2</sub> O | ETM-H <sub>2</sub> O | macrolides (MLs)       | erythromycin- <sup>13</sup> C-D <sub>3</sub> |
| Clarithromycin                | CTM                  | macrolides (MLs)       | erythromycin- <sup>13</sup> C-D <sub>3</sub> |
| Roxithromycin                 | RTM                  | macrolides (MLs)       | erythromycin- <sup>13</sup> C-D <sub>3</sub> |
| Oxytetracycline               | OTC                  | tetracyclines (TCs)    | meclocycline                                 |
| Tetracycline                  | TC                   | tetracyclines (TCs)    | meclocycline                                 |
| Chlorotetracycline            | CTC                  | tetracyclines (TCs)    | meclocycline                                 |
| Doxycycline                   | DC                   | tetracyclines (TCs)    | meclocycline                                 |

a. Abbr.: abbreviation;

b. ISTD: internal standard chemicals;

**Table S2. HPLC working conditions for quantification of the target antibiotics**

| Parameter               | SAs, FQs, MLs, TCs ESI+                   |
|-------------------------|-------------------------------------------|
| Column temperature (°C) | 40                                        |
| Flow rate (mL/min)      | 0.30                                      |
| Mobile phase A          | 0.2%Formic acid and 2 Mm ammonium acetate |
| Mobile phase B          | Acetonitrile                              |
| Elution gradient        | 0 min: 10% B                              |
|                         | 0~5 min: 15% B                            |
|                         | 5~7 min: 20% B                            |
|                         | 7~11 min: 40% B                           |
|                         | 11~15 min: 60% B                          |
|                         | 15~16 min: 95% B                          |
|                         | 16~25 min: 95% B                          |

**Table S3. PNECs of the detected antibiotics for different living organisms in waters**

| Compounds            | PNECs (ng/L)     |                                  |                             |
|----------------------|------------------|----------------------------------|-----------------------------|
|                      | Freshwater algae | Invertebrates ( <i>Daphnia</i> ) | Fish<br>(zebrafish embryos) |
| SDZ                  | 40390            | 1000                             | 238300                      |
| SPD                  | 20790            | 700                              | 45400                       |
| TMP                  | N.D              | 16000                            | N.D                         |
| SMZ                  | 19470            | 700                              | 32600                       |
| SM                   | 1200             | N.D                              | N.D                         |
| SMM                  | 4750             | 1500                             | N.D                         |
| SCP                  | 28080            | 800                              | 78900                       |
| SMX                  | 150              | 252000                           | 562500                      |
| SQX                  | 700              | 15000                            | N.D                         |
| SDM                  | 9850             | 2259                             | 166297                      |
| SCT                  | 8562             | 900                              | 71903                       |
| STZ                  | 1600             | 800                              | 10000                       |
| MAR                  | 30000            | 24000                            | 60000                       |
| NFX                  | 4750             | 2400                             | 9830                        |
| OFL                  | 1000             | 530                              | 6500                        |
| CIP                  | 2500             | 1100                             | 8700                        |
| EFX                  | N.D              | 357900                           | N.D                         |
| PEF                  | N.D              | 419700                           | N.D                         |
| LIN                  | 70               | 7200                             | 1040222                     |
| ETM-H <sub>2</sub> O | 2300             | 940                              | 10000000                    |
| CTM                  | 1400             | 4200                             | 4990                        |
| LIN                  | 70               | 7200                             | 1040222                     |
| RTM                  | 4660             | 6000                             | 23000                       |
| OTC                  | 12500            | 8900                             | 65100                       |
| TC                   | 8800             | 6270                             | N.D                         |
| CTC                  | 5000             | 2450                             | N.D                         |
| DC                   | 25000            | 12400                            | 95000                       |

The acute and chronic toxicity data were derived from literatures [3-7].

PNECs was calculated from the toxicity data using an assessment factor (AF) of 1000 for acute toxicity and an AF of 100 for chronic toxicity.

N.D., no data reported.

**Table S4. Average recoveries, limit of detection (LOD) and limit of quantification (LOQ) of seventeen target antibiotics for wastewater samples**

| Antibiotics          | Influent               |            |            | Secondary effluent     |            |            | Sludge                 |            |            |
|----------------------|------------------------|------------|------------|------------------------|------------|------------|------------------------|------------|------------|
|                      | Average recoveries (%) | LOD (ng/L) | LOQ (ng/L) | Average recoveries (%) | LOD (ng/L) | LOQ (ng/L) | Average recoveries (%) | LOD (ng/g) | LOQ (ng/g) |
| SDZ                  | 69.1±5.8               | 0.39       | 1.29       | 79.1±4.2               | 0.44       | 1.29       | 74.2±3.8               | 0.74       | 2.35       |
| SPD                  | 95.9±9.8               | 0.31       | 1.03       | 94.7±5.6               | 0.64       | 1.92       | 98.0±5.1               | 1.24       | 3.72       |
| TMP                  | 96.0±6.2               | 0.29       | 0.96       | 96.2±5.4               | 0.45       | 1.35       | 123.4±13.6             | 0.94       | 3.12       |
| SMZ                  | 100.7±11.6             | 0.57       | 1.87       | 105.7±12.6             | 2.32       | 6.98       | 98.8±7.9               | 3.61       | 10.84      |
| SM                   | 74.2±3.8               | 0.30       | 0.98       | 78.4±4.5               | 1.58       | 4.77       | 91.4±13.7              | 2.98       | 9.32       |
| SMM                  | 98.0±5.1               | 10.71      | 33.2       | 99.2±5.3               | 12.3       | 36.8       | 108.2±11.9             | 4.8        | 15.2       |
| SCP                  | 123.4±13.6             | 5.21       | 16.2       | 125.7±11.5             | 5.6        | 16.8       | 99.6±7.2               | 6.4        | 19.5       |
| SMX                  | 98.8±7.9               | 0.25       | 0.82       | 86.5±7.8               | 0.56       | 1.68       | 106.6±9.7              | 1.24       | 3.72       |
| SA                   | 88.8±6.9               | 0.45       | 1.35       | 84.5±7.8               | 0.46       | 1.54       | 116.6±9.7              | 2.24       | 6.72       |
| SQX                  | 91.4±13.7              | 0.52       | 1.73       | 90.2±11.7              | 0.59       | 1.84       | 108.1±17.3             | 0.55       | 1.65       |
| SDM                  | 108.2±11.9             | 2.2        | 1.02       | 101.2±10.4             | 1.84       | 5.78       | 87.3±9.9               | 0.94       | 2.98       |
| SCT                  | 99.6±7.2               | 1.02       | 3.37       | 97.6±5.4               | 2.46       | 7.56       | 87.3±9.9               | 3.42       | 10.21      |
| STZ                  | 106.6±9.7              | 0.21       | 0.7        | 101.2±6.5              | 1.21       | 3.68       | 133.1±5.8              | 1.89       | 5.74       |
| MAR                  | 108.1±17.3             | 1.1        | 3.63       | 104.5±12.4             | 3.4        | 10.2       | 74.2±3.8               | 1.57       | 4.85       |
| NFX                  | 87.3±9.9               | 0.89       | 2.93       | 82.5±8.2               | 0.8        | 2.45       | 98.0±5.1               | 3.4        | 10.23      |
| OFL                  | 133.1±5.8              | 0.29       | 0.96       | 110.1±4.5              | 0.68       | 1.95       | 119.4±13.6             | 6.4        | 19.4       |
| CIP                  | 74.2±3.8               | 0.30       | 0.98       | 78.2±4.2               | 0.8        | 2.45       | 97.8±7.9               | 1.24       | 3.69       |
| EFX                  | 98.0±5.1               | 0.71       | 2.33       | 99.5±6.5               | 0.4        | 1.32       | 133.1±5.8              | 5.6        | 16.8       |
| PEF                  | 119.4±13.6             | 0.21       | 0.7        | 117.1±11.7             | 0.47       | 1.47       | 74.2±3.8               | 4.2        | 12.6       |
| LIN                  | 97.8±7.9               | 0.25       | 0.82       | 94.1±7.5               | 0.48       | 1.48       | 98.0±5.1               | 0.55       | 16.5       |
| ETM-H <sub>2</sub> O | 91.4±13.7              | 0.52       | 1.73       | 91.4±13.7              | 0.79       | 2.48       | 97.6±5.4               | 3.42       | 10.3       |
| CTM                  | 108.2±11.9             | 2.2        | 1.02       | 108.2±11.9             | 0.94       | 3.1        | 101.2±6.5              | 1.45       | 4.45       |
| RTM                  | 106.6±9.7              | 0.21       | 0.7        | 106.6±9.7              | 0.68       | 2.24       | 104.5±12.4             | 2.52       | 7.5        |
| OTC                  | 108.1±17.3             | 1.1        | 3.63       | 108.1±17.3             | 1.2        | 3.62       | 82.5±8.2               | 0.94       | 2.97       |
| TC                   | 101.1±11.3             | 0.23       | 0.39       | 101.1±11.3             | 1.14       | 3.45       | 110.1±4.5              | 3.42       | 10.41      |
| CTC                  | 98.2±10.3              | 1.0        | 3.3        | 98.2±10.3              | 1.08       | 3.54       | 78.2±4.2               | 1.89       | 5.8        |
| DC                   | 88.1±9.3               | 0.45       | 1.35       | 88.1±9.3               | 0.9        | 3.1        | 97.6±5.4               | 1.57       | 4.6        |
